# Supplementary material for: Spatial Profiling of Nuclear Receptor Transcription Patterns over the Course of Drosophila Development
Source: PubMed Central journal article supplement (PMC3704245; doi:10.1534/g3.113.006023), 2013-07-01
Supplement: supp_g3.113.006023_006023SI.pdf [file supp_g3.113.006023_006023SI.pdf]

**Spatial profiling of nuclear receptor transcription patterns over the course of *Drosophila* development**

Ronit Wilk, Jack Hu and Henry M. Krause

DOI: [10.1534/g3.113.006023](https://doi.org/10.1534/g3.113.006023)



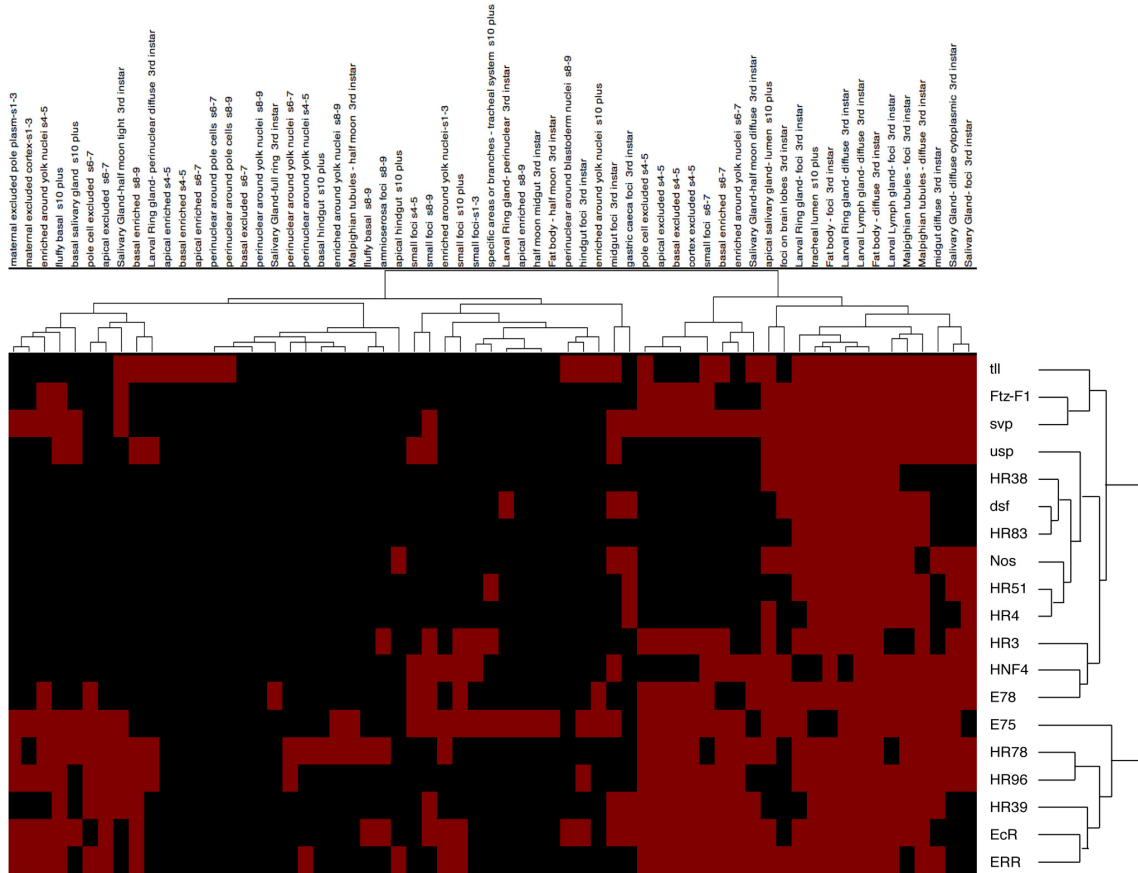

**Figure S2 Subcellular localization relationships** Cluster comparisons between all 18 nuclear receptors and *NOS* subcellular localization patterns was obtained using 'Gene Cluster' and 'Java TreeView' software. NR gene identities are listed to the right of each row, and terms for subcellular distributions and stages analyzed are listed above each column. red = expression; black = no expression;. The trees on the right and the top show groupings by overall similarity.

**Table S1 *Drosophila* nuclear receptor and NOS isoforms and probes.** CG numbers, number of splice forms, and oligos used for probe template production are provided for each of the fly NR genes and NOS.

| Gene name (Abbreviation)                         | CG number                  | Number of isoforms | Probe name  | Oligos used (if home made)                                                                | It hybridizes to (size in base pairs)                                 |
|--------------------------------------------------|----------------------------|--------------------|-------------|-------------------------------------------------------------------------------------------|-----------------------------------------------------------------------|
| <i>Ecdysone receptor</i> (EcR)                   | CG1765                     | 6                  | LD26915     | NA                                                                                        | Multiple exons- including some 3'UTR. Covers all isoforms (1896)      |
| <i>ultraspiracle</i> (usp)                       | CG4380                     | 1                  | LD09973     | NA                                                                                        | The entire transcript (2481)                                          |
| <i>Hormone receptor-like in 46</i> (Hr46 or HR3) | CG3318<br>3                | 6                  | GH09429     | NA                                                                                        | Multiple exons and UTRs. Covers all isoforms (3827)                   |
|                                                  |                            |                    | GH21112     | NA                                                                                        | Multiple exons including 3'UTR. Covers all isoforms (4248)            |
| <i>Hr4</i> (HR4)                                 | CG4393<br>4<br>CG1690<br>2 | 9                  | HM-DHR4     | up:<br>5'..GACATG<br>AAGCCCAT<br>GTTCCCT                                                  | Part of last exon. Covers all isoforms and CG42527 (830)              |
|                                                  |                            |                    |             | down*:<br>5'..ATTAGC<br>GTGGTCAA<br>GCAGGT                                                |                                                                       |
| <i>Ecdysone-induced protein 75B</i> (E75)        | CG8127                     | 6                  | GM04985     | NA                                                                                        | Multiple exons including part of 3'UTR. Covers of all isoforms (3107) |
| <i>Ftz transcription factor 1</i> (Ftz-F1)       | CG4059                     | 3                  | LD34889     | NA                                                                                        | Multiple exons and part of 3'UTR. Covers all isoforms (2270)          |
|                                                  |                            |                    | LD11885     | NA                                                                                        | First exon. Covers RB isoform (842)                                   |
| <i>Hormone receptor-like in 39</i> (HR39)        | CG8676                     | 4                  | LD45021     | NA                                                                                        | Almost the entire transcript. Covers all isoforms (2999)              |
| <i>Hormone-receptor-like in 78</i> (HR78)        | CG7199                     | 6                  | GH08073     | NA                                                                                        | The entire transcript. Covers all isoforms (2283)                     |
| <i>Hormone receptor-like in 96</i> (HR96)        | CG1178<br>3                | 1                  | GH14435     | NA                                                                                        | The entire transcript (2834)                                          |
| <i>estrogen-related receptor</i> (dERR)          | CG7404                     | 2                  | GH28308     | NA                                                                                        | The entire transcript. Covers both isoforms (2125)                    |
| <i>Hepatocyte nuclear factor 4</i> (dHNF4)       | CG9310                     | 4                  | RE09535     | NA                                                                                        | The entire transcript. Covers all isoforms (3333)                     |
| <i>seven up</i> (svp)                            | CG1150<br>2                | 3                  | AT29920     | NA                                                                                        | The entire transcript. Covers RA and RB isoforms (2085)               |
|                                                  |                            |                    | GH08189     | NA                                                                                        | 3' UTR. Covers RC and RB isoforms (2023)                              |
| <i>Ecdysone-induced protein 78C</i> (E78)        | CG1802<br>3                | 4                  | HM-E78-Ex10 | up:<br>5'..CTTGCT<br>GAACTTTG<br>CCAACA<br><br>down*:<br>5'..GCTCGC<br>TCTTCAGT<br>CGAGTT | Last exon, including part of 3'UTR. Covers all isoforms (764)         |

|                                                  |             |    |                      |                                                                                           |                                                                            |
|--------------------------------------------------|-------------|----|----------------------|-------------------------------------------------------------------------------------------|----------------------------------------------------------------------------|
| <i>dissatisfaction</i><br>(dsf)                  | CG9019      | 1  | HM-dsf-<br>Ex4       | up:<br>5'..ACTCCA<br>TCCAGTCC<br>ATCTCG<br><br>down*:<br>5'..AGCAA<br>TGCTGGTC<br>GTTCTT  | Part of exon 4<br>(637)                                                    |
| <i>talilles</i><br>(tll)                         | CG1378      | 1  | HM-tll-Ex3           | up:<br>5'..AGGGAC<br>TCTGTGTG<br>GTGGAC<br><br>down*:<br>5'..TTGAGA<br>CCTTGTGC<br>ATCAGC | Most of exon 3<br>(1041)                                                   |
| <i>Hormone receptor</i><br>51<br>(HR51)          | CG1680<br>1 | 1  | HM-<br>DHR51-<br>Ex6 | up:<br>5'..ACCACC<br>TCACCTCC<br>TCAATG<br><br>down*:<br>5'..AAGAGC<br>TGACGGAG<br>GAGACA | Most of exon 6<br>(249)                                                    |
| <i>Hormone<br/>receptor-like in 38</i><br>(HR38) | CG1864      | 3  | HM-<br>DHR38         | up:<br>5'..CGACCA<br>CGTCACCT<br>ACAATG<br><br>down*:<br>5'..TAGTGC<br>CGAATGTT<br>GAGCAG | Last exon and part of 3'UTR.<br>Covers of all isoforms<br>(644)            |
| <i>Hormone receptor</i><br>83<br>(HR83)          | CG1029<br>6 | 1  | HM-<br>DHR83-<br>Ex1 | up:<br>5'..GGTGCT<br>CCTGCTTT<br>TTCAAG<br><br>down*:<br>5'..GCACAG<br>GATTAGGG<br>ACTCCA | Most of exon 1<br>(542)                                                    |
| <i>Nitric oxide<br/>synthase</i><br>(Nos)        | CG6713      | 10 | HM-NOS-<br>Ex16#     | up:<br>5'..GAACGA<br>TTCGCTGA<br>CTGTGA<br><br>down*:<br>5'..CTTCGG<br>AATGGCCT<br>GCTCC  | Part of exon 16. Covers 8/10<br>isoforms (not Nos-RJ nor Nos-RG)<br>(1078) |

\*-The sequence: 'GTAATACGACTCACTATAGGGAGACCAC' was added before each reverse oligo sequence to add a T7 polymerase binding site.

#- For the HM-NOS-E16 probe, PCR was first performed on genomic DNA with the following oligos: up-TCGGCTATCCAAATTTCTG and down- ACTCCTCGGTCCAAACACAC (1871 bp). The product was then amplified using the oligos indicated in the table to generate the 1078 bp template.

Table S2 Summary of FISH expression data.

| Gene           | Stage    | Yolk | Gut | Hindgut | Foregut | Trachea | Post. spiracles | Fat Body | Ectoderm | PNS | CNS | Muscles | Oenocytes | Amnioserosa | Salivary glands | Malpighian tubules | Lymph gland | Ring gland | Brain lobes |    |
|----------------|----------|------|-----|---------|---------|---------|-----------------|----------|----------|-----|-----|---------|-----------|-------------|-----------------|--------------------|-------------|------------|-------------|----|
| <b>Ecr *</b>   | E1-5     | +    | NA  | NA      | NA      | NA      | NA              | NA       | NA       | NA  | NA  | NA      | NA        | NA          | NA              | NA                 | NA          | NA         | NA          | NA |
|                | E6-10    | +    |     | NA      | NA      | NA      | NA              | NA       |          |     |     | NA      |           | +           |                 | NA                 | NA          | NA         | NA          | NA |
|                | E11-14   |      | +   | +       | NA      |         | +               |          |          | +/- | +/- |         |           | +           | +               | NA                 | NA          | NA         | NA          | NA |
|                | E15-17   |      | +   | +       | +       | +       | +               |          | +        |     | +/- |         |           | NA          | +               |                    | NA          | NA         | NA          | NA |
|                | L3       | NA   | +   | +       | +       | +       | NA              | +        | NA       | NA  | +   | NA      | NA        | NA          | +               | +                  | +           | +          | +           | +  |
| <b>Usp ~*</b>  | E1-5     | +    | NA  | NA      | NA      | NA      | NA              | NA       | NA       | NA  | NA  | NA      | NA        | NA          | NA              | NA                 | NA          | NA         | NA          | NA |
|                | E6-10    | +    | +   | NA      | NA      | NA      | NA              | NA       | +/-      |     | +/- | NA      |           | +           |                 | NA                 | NA          | NA         | NA          | NA |
|                | E11-14   | +    | +   |         | NA      |         |                 |          | +        |     | +   |         |           | +/-         | +               | NA                 | NA          | NA         | NA          | NA |
|                | E15-17   | +    | +   |         | +       |         |                 |          | +        |     | +   | +       |           | NA          | +               | +/-                | NA          | NA         | NA          | NA |
|                | L3       | NA   | +   | +       | +       | +       | NA              | +        | NA       | NA  | +   | NA      | NA        | NA          | +               | +                  | +           | +          | +           | +  |
| <b>HR3</b>     | E1-5     | +    | NA  | NA      | NA      | NA      | NA              | NA       | NA       | NA  | NA  | NA      | NA        | NA          | NA              | NA                 | NA          | NA         | NA          | NA |
|                | E6-10    | +    | +   | NA      | NA      | NA      | NA              | NA       | +        |     |     | NA      |           | +           |                 | NA                 | NA          | NA         | NA          | NA |
|                | E11-14   | +    | +   | +       | NA      | +       | +               | +        | +        |     |     | +       |           | +           | +               | NA                 | NA          | NA         | NA          | NA |
|                | E15-17   | +    | +   | +       | +       | +       | +               | +        | +        | +   | +   | +       |           | NA          | +               |                    | NA          | NA         | NA          | NA |
|                | L3       | NA   | +   | +       | +       | +       | NA              | +        | NA       | NA  | +   | NA      | NA        | NA          | +               | +                  | +           | +          | +           | +  |
| <b>HR4</b>     | E1-5     | +    | NA  | NA      | NA      | NA      | NA              | NA       | NA       | NA  | NA  | NA      | NA        | NA          | NA              | NA                 | NA          | NA         | NA          | NA |
|                | E6-10    |      |     | NA      | NA      | NA      | NA              | NA       |          |     |     | NA      |           |             |                 | NA                 | NA          | NA         | NA          | NA |
|                | E11-14   | +    | +   | +       | NA      |         |                 |          |          |     |     | +       |           |             | +               | NA                 | NA          | NA         | NA          | NA |
|                | E15-17   | +    | +   | +       | +       | +       | +               | +        |          |     |     | +       |           | NA          | +               |                    | NA          | NA         | NA          | NA |
|                | L3       | NA   |     |         |         | +       | NA              | +        | NA       | NA  |     | NA      | NA        | NA          | +               | +                  | +           | +          | +           | +  |
| <b>E75</b>     | E1-5     | +    | NA  | NA      | NA      | NA      | NA              | NA       | NA       | NA  | NA  | NA      | NA        | NA          | NA              | NA                 | NA          | NA         | NA          | NA |
|                | E6-10    | +    |     | NA      | NA      | NA      | NA              | NA       |          |     |     | NA      |           |             |                 | NA                 | NA          | NA         | NA          | NA |
|                | E11-14   | +    | +   |         | NA      | +       |                 |          | +        | +   |     |         |           | +           | +               | NA                 | NA          | NA         | NA          | NA |
|                | E15-17   | +    | +   |         | +       | +       | +/-             |          |          | +   | +   |         | +         | NA          | +               | +                  | NA          | NA         | NA          | NA |
|                | L3       | NA   | +   | +       | +       | +       | NA              | +        | NA       | NA  | +   | NA      | NA        | NA          | +               | +                  | +           | +          | +           | +  |
| <b>Fz-F1 *</b> | E1-5     | +    | NA  | NA      | NA      | NA      | NA              | NA       | NA       | NA  | NA  | NA      | NA        | NA          | NA              | NA                 | NA          | NA         | NA          | NA |
|                | E6-10    | +    |     | NA      | NA      | NA      | NA              | NA       |          |     |     | NA      |           |             |                 | NA                 | NA          | NA         | NA          | NA |
|                | E11-14   |      | +   | +       | NA      | +       |                 |          | +        | +/- | +   |         |           |             | +               | NA                 | NA          | NA         | NA          | NA |
|                | E15-17   | +    | +   |         | +       | +       | +               |          | +        | +/- | +   |         |           | NA          | +               |                    | NA          | NA         | NA          | NA |
|                | L3       | NA   | +   | +       |         | +       | NA              | +        | NA       | NA  | +   | NA      | NA        | NA          | +               | +                  | +           | +          | +           | +  |
| <b>HR39 *</b>  | E1-5     | +    | NA  | NA      | NA      | NA      | NA              | NA       | NA       | NA  | NA  | NA      | NA        | NA          | NA              | NA                 | NA          | NA         | NA          | NA |
|                | E6-10    | +    |     | NA      | NA      | NA      | NA              | NA       |          |     |     | NA      |           | +           |                 | NA                 | NA          | NA         | NA          | NA |
|                | E11-14   | +    | +   |         | NA      |         |                 | +        | +        |     |     |         |           |             |                 | NA                 | NA          | NA         | NA          | NA |
|                | E15-17   |      | +   |         | +       | +       | +               | +        | +        |     | +   |         |           | NA          | +               |                    | NA          | NA         | NA          | NA |
|                | L3       | NA   | +   | +       |         | +       | NA              | +        | NA       | NA  |     | NA      | NA        | NA          | +               | +                  | +           | +          |             |    |
| <b>IR7</b>     | <b>8</b> | E1-5 | +   | NA      | NA      | NA      | NA              | NA       | NA       | NA  | NA  | NA      | NA        | NA          | NA              | NA                 | NA          | NA         | NA          | NA |

|         |        |       |     |    |     |     |    |     |    |    |    |    |    |    |     |     |     |    |    |
|---------|--------|-------|-----|----|-----|-----|----|-----|----|----|----|----|----|----|-----|-----|-----|----|----|
|         | E6-10  | +     |     | NA | NA  | NA  | NA | NA  |    |    |    | NA |    | +  |     | NA  | NA  | NA | NA |
|         | E11-14 |       | +   | +  | NA  | +   |    |     | +  |    | +  |    |    |    | +   | NA  | NA  | NA | NA |
|         | E15-17 |       | +   | +  | +   | +   |    | +/- | +  |    | +  |    |    | NA | +   |     | NA  |    | NA |
|         | L3     | NA    | +   | +  |     | +   | NA | +   | NA | NA |    | NA | NA | NA | +   | +   | +   | +  | +  |
| HR96 *  | E1-5   | +     | NA  | NA | NA  | NA  | NA | NA  | NA | NA | NA | NA | NA | NA | NA  | NA  | NA  | NA | NA |
|         | E6-10  | +     |     | NA | NA  | NA  | NA | NA  | +  |    |    | NA |    |    |     | NA  | NA  | NA | NA |
|         | E11-14 |       | +   | +  | NA  |     |    |     | +  |    | +  | +  |    |    |     | NA  | NA  | NA | NA |
|         | E15-17 |       | +   | +  | +   | +   | +  |     |    |    | +  |    |    | NA |     |     | NA  | NA | NA |
| L3      | NA     | +     | +   |    | +   | NA  | +  | NA  | NA | +  | NA | NA | NA | +  | +   | +   | +   | +  |    |
| dERR *  | E1-5   | +     | NA  | NA | NA  | NA  | NA | NA  | NA | NA | NA | NA | NA | NA | NA  | NA  | NA  | NA | NA |
|         | E6-10  | +     |     | NA | NA  | NA  | NA | NA  |    |    |    | NA |    | +  |     | NA  | NA  | NA | NA |
|         | E11-14 |       | +/- |    | NA  |     |    |     |    | +  |    |    |    | +  | +   | NA  | NA  | NA | NA |
|         | E15-17 |       |     | +  | +   | +   | +  | +/- | +  |    | +  | +  |    | NA | +   |     | NA  | NA | NA |
| L3      | NA     | +     | +   | +  | +   | NA  | +  | NA  | NA | +  | NA | NA | NA | +  | +   | +   | +   | +  |    |
| dHNF4 * | E1-5   | +     | NA  | NA | NA  | NA  | NA | NA  | NA | NA | NA | NA | NA | NA | NA  | NA  | NA  | NA | NA |
|         | E6-10  | +     |     | NA | NA  | NA  | NA | NA  | +  |    |    | NA |    | +  |     | NA  | NA  | NA | NA |
|         | E11-14 |       | +/- |    | NA  |     |    |     | +  |    |    |    | +  |    | +   | NA  | NA  | NA | NA |
|         | E15-17 |       | +/- |    | +   |     |    |     | +  |    | +  |    | +  | NA | +   | +   | NA  | NA | NA |
| L3      | NA     | +     | +   |    | +   | NA  | +  | NA  | NA | +  | NA | NA | NA | +  | +   | +   | +/- | +  |    |
| Svp *   | E1-5   | +     | NA  | NA | NA  | NA  | NA | NA  | NA | NA | NA | NA | NA | NA | NA  | NA  | NA  | NA | NA |
|         | E6-10  | +     |     | NA | NA  | NA  | NA | NA  |    | +  | +  | NA |    |    | +   | NA  | NA  | NA | NA |
|         | E11-14 |       | +/- |    | NA  | +   | +  |     |    | +  | +  |    | +  |    | +   | NA  | NA  | NA | NA |
|         | E15-17 |       |     |    | +   | +   | +  | +   | +  | +  | +  |    | +  | NA | +\$ |     | NA  | NA | NA |
| L3      | NA     | +     |     | +  | +   | NA  | +  | NA  | NA | +  | NA | NA | NA | +  | +   | +   | +   | +  |    |
| E78     | E1-5   | + S5  | NA  | NA | NA  | NA  | NA | NA  | NA | NA | NA | NA | NA | NA | NA  | NA  | NA  | NA | NA |
|         | E6-10  | +     | +   |    | NA  | NA  | NA | NA  | +  |    |    | NA |    | +  |     | NA  | NA  | NA | NA |
|         | E11-14 | +     | +   |    | NA  |     |    | +   | +  | +  |    |    |    | +  | +   | NA  | NA  | NA | NA |
|         | E15-17 |       |     |    | +   | +   | +  |     | +  |    |    |    |    | NA | +   | +/- | NA  | NA | NA |
| L3      | NA     | +     | +   | +  | +   | NA  | +  | NA  | NA | +  | NA | NA | NA | +  | +   | +   | +   | +  |    |
| dsf     | E1-5   |       | NA  | NA | NA  | NA  | NA | NA  | NA | NA | NA | NA | NA | NA | NA  | NA  | NA  | NA | NA |
|         | E6-10  |       |     |    | NA  | NA  | NA | NA  |    |    |    | NA |    |    |     | NA  | NA  | NA | NA |
|         | E11-14 |       |     |    | NA  |     |    |     |    |    |    |    |    |    | +   | NA  | NA  | NA | NA |
|         | E15-17 |       |     |    |     | +/- | +  |     |    |    |    |    |    | NA | +   |     | NA  | NA | NA |
| L3      | NA     | +     |     |    | +/- | NA  | +  | NA  | NA |    | NA | NA | NA | +  | +   | +   | +   | +  |    |
| tII     | E1-5   | +/- % | NA  | NA | NA  | NA  | NA | NA  | NA | NA | NA | NA | NA | NA | NA  | NA  | NA  | NA | NA |
|         | E6-10  | +/- % |     |    | NA  | NA  | NA | NA  |    |    |    | NA |    |    |     | NA  | NA  | NA | NA |
|         | E11-14 | +     | +/- |    | NA  |     |    |     |    | +  |    |    |    |    | +   | NA  | NA  | NA | NA |
|         | E15-17 | +     | +/- |    | +   | +   |    |     | +  |    | +  |    |    | NA | +   |     | NA  | NA | NA |
| L3      | NA     | +     | +   | +  | +   | NA  | +  | NA  | NA | +  | NA | NA | NA | +  | +   | +   | +   | +  |    |

|      |        |     |    |    |    |     |    |     |    |     |     |    |    |    |    |    |    |    |    |    |
|------|--------|-----|----|----|----|-----|----|-----|----|-----|-----|----|----|----|----|----|----|----|----|----|
| HR51 | E1-5   |     | NA | NA | NA | NA  | NA | NA  | NA | NA  | NA  | NA | NA | NA | NA | NA | NA | NA | NA |    |
|      | E6-10  |     |    | NA | NA | NA  | NA | NA  |    |     |     | NA |    |    |    | NA | NA | NA | NA |    |
|      | E11-14 |     |    |    | NA | +   | +  | (^) |    | +   | (#) | +  |    |    |    |    | NA | NA | NA | NA |
|      | E15-17 |     |    |    | +  | +   | +  | (^) |    | +   | (#) |    |    |    | NA | +  |    | NA | NA | NA |
|      | L3     | NA  |    |    |    | +/- | NA | +   | NA | NA  |     | NA | NA | NA | +  | +  | +  | +  | +  |    |
| HR38 | E1-5   |     | NA | NA | NA | NA  | NA | NA  | NA | NA  | NA  | NA | NA | NA | NA | NA | NA | NA | NA |    |
|      | E6-10  |     |    | NA | NA | NA  | NA | NA  |    |     |     | NA |    |    |    | NA | NA | NA | NA |    |
|      | E11-14 |     |    |    | NA |     |    |     |    |     |     |    |    |    |    | NA | NA | NA | NA |    |
|      | E15-17 |     |    |    |    | +   | +  |     | +  | +/- |     |    |    |    | NA | +  |    | NA | NA | NA |
|      | L3     | NA  |    |    |    | +   | NA | +   | NA | NA  | +   | NA | NA | NA |    |    | +  | +  |    |    |
| HR33 | E1-5   |     | NA | NA | NA | NA  | NA | NA  | NA | NA  | NA  | NA | NA | NA | NA | NA | NA | NA | NA |    |
|      | E6-10  |     |    | NA | NA | NA  | NA | NA  |    |     |     | NA |    |    |    | NA | NA | NA | NA |    |
|      | E11-14 |     |    |    | NA |     |    |     |    |     |     |    |    |    | +  | NA | NA | NA | NA |    |
|      | E15-17 |     |    |    |    | +   |    |     |    |     |     |    |    | NA | +  |    | NA | NA | NA |    |
|      | L3     | NA  |    |    |    | +/- | NA | +   | NA | NA  |     | NA | NA | NA | +  | +  | +  | +  |    |    |
| Nos  | E1-5   | +/- | NA | NA | NA | NA  | NA | NA  | NA | NA  | NA  | NA | NA | NA | NA | NA | NA | NA | NA |    |
|      | E6-10  | +   | +  | NA | NA | NA  | NA | NA  |    |     |     | NA |    |    |    | NA | NA | NA | NA |    |
|      | E11-14 | +   | +  | +  | NA |     |    |     |    |     |     |    |    |    |    | NA | NA | NA | NA |    |
|      | E15-17 | +   | +  | +  | +  | +   | +  | +   |    |     | +   | +  |    | NA | +  |    | NA | NA | NA |    |
|      | L3     | NA  | +  |    | +  | +   | NA | +   | NA | NA  |     | NA | NA | NA | +  | +  | +  | +  | +  |    |

+: expressed, NA: not applicable, \*: “fluffy” basal localization, ^: posterior spiracle outer layer, #: stripes, s5: stage 5 only, %: *tll* is zygotically expressed at this stage, some transcript ends up at the yolk. ~: low ubiquitous expression, @: specific to *svp*-AT29920 probe, \$: specific to *svp*-GH0819 probe. Shaded grey: matches spatial activities noted in Palanker *et al* 2006.



**Table S3 Summary of FISH subcellular patterns.** A summary of all the subcellular RNA patterns found in this study. The developmental stages are shown at the left of the Table. +: pattern present, -: pattern absent.

| Stage        | Term                             | <i>ECR</i> | <i>usp</i> | <i>HR3</i> | <i>HR4</i> | <i>E75</i> | <i>Ftz-F1</i> | <i>HR39</i> | <i>HR78</i> | <i>HR96</i> | <i>dERR</i> | <i>dHNF4</i> | <i>svp</i> | <i>E78</i> | <i>dsf</i> | <i>tll</i> | <i>HR51</i> | <i>HR38</i> | <i>HR83</i> | <i>Nos</i> |
|--------------|----------------------------------|------------|------------|------------|------------|------------|---------------|-------------|-------------|-------------|-------------|--------------|------------|------------|------------|------------|-------------|-------------|-------------|------------|
| Embryo 1-3   | Pole plasm excluded              | +          | -          | -          | -          | +          | -             | -           | +           | +           | +           | -            | +          | -          | -          | -          | -           | -           | -           | -          |
|              | Cortex excluded                  | +          | -          | -          | -          | +          | -             | -           | -           | +           | +           | -            | +          | -          | -          | -          | -           | -           | -           | -          |
|              | Small foci                       | -          | -          | +          | -          | +          | -             | -           | -           | -           | -           | +            | -          | -          | -          | -          | -           | -           | -           | -          |
|              | Enriched around yolk nuclei      | +          | -          | -          | -          | +          | -             | -           | +           | -           | +           | +            | -          | -          | -          | -          | -           | -           | -           | -          |
| Embryo 4-5   | Pole cell excluded               | +          | -          | +          | -          | +          | +             | +           | +           | +           | +           | -            | +          | +          | -          | +          | -           | -           | -           | -          |
|              | Apical excluded                  | +          | -          | +          | -          | +          | +             | +           | +           | +           | +           | -            | +          | +          | -          | -          | -           | -           | -           | -          |
|              | Basal excluded                   | +          | -          | +          | -          | +          | +             | +           | +           | +           | +           | -            | +          | +          | -          | -          | -           | -           | -           | -          |
|              | Cortex excluded                  | +          | -          | +          | -          | +          | +             | +           | +           | +           | +           | -            | +          | +          | -          | -          | -           | -           | -           | -          |
|              | Apical enriched                  | -          | -          | -          | -          | -          | -             | -           | -           | -           | -           | -            | -          | -          | -          | +          | -           | -           | -           | -          |
|              | Basal enriched                   | -          | -          | -          | -          | -          | -             | -           | -           | -           | -           | -            | -          | -          | -          | +          | -           | -           | -           | -          |
|              | Enriched around yolk nuclei      | +          | -          | -          | -          | +          | +             | -           | +           | +           | +           | -            | +          | +          | -          | -          | -           | -           | -           | +          |
|              | Perinuclear- yolk nuclei         | -          | -          | -          | -          | -          | -             | -           | +           | -           | +           | -            | -          | -          | -          | -          | -           | -           | -           | -          |
| Embryo 6-7   | Pole cell excluded               | -          | -          | -          | -          | +          | -             | +           | +           | +           | +           | -            | -          | +          | -          | -          | -           | -           | -           | -          |
|              | Apical excluded                  | +          | -          | -          | -          | +          | -             | +           | +           | +           | +           | -            | -          | -          | -          | -          | -           | -           | -           | -          |
|              | Basal excluded                   | -          | -          | -          | -          | -          | -             | -           | -           | -           | -           | -            | -          | -          | -          | -          | -           | -           | -           | -          |
|              | Apical enriched                  | -          | -          | -          | -          | -          | -             | -           | -           | -           | -           | -            | -          | -          | -          | +          | -           | -           | -           | -          |
|              | Basal enriched                   | +          | -          | +          | -          | +          | -             | +           | +           | +           | +           | +            | +          | +          | -          | +          | -           | -           | -           | -          |
|              | Enriched around yolk nuclei      | +          | -          | -          | -          | +          | -             | +           | +           | +           | +           | +            | +          | -          | -          | -          | -           | -           | -           | +          |
|              | Perinuclear- yolk nuclei         | -          | -          | -          | -          | -          | -             | -           | +           | +           | -           | -            | -          | -          | -          | -          | -           | -           | -           | -          |
|              | Perinuclear- pole cells          | -          | -          | -          | -          | -          | -             | -           | -           | -           | -           | -            | -          | -          | -          | +          | -           | -           | -           | -          |
| Embryo 8-9   | Small foci                       | +          | -          | +          | -          | +          | +             | +           | -           | +           | +           | +            | +          | +          | -          | +          | -           | -           | -           | -          |
|              | Apical enriched                  | -          | -          | -          | -          | +          | -             | -           | -           | -           | -           | -            | -          | -          | -          | -          | -           | -           | -           | -          |
|              | Basal enriched                   | +          | +          | -          | -          | -          | -             | +           | +           | +           | +           | -            | -          | -          | -          | +          | -           | -           | -           | +          |
|              | Fluffy basal                     | +          | -          | -          | -          | -          | -             | -           | +           | -           | -           | -            | -          | -          | -          | -          | -           | -           | -           | -          |
|              | Enriched around yolk nuclei      | -          | -          | -          | -          | +          | -             | -           | +           | -           | -           | -            | -          | -          | -          | -          | -           | -           | -           | +          |
|              | Perinuclear- yolk nuclei         | -          | -          | -          | -          | -          | -             | -           | -           | -           | -           | -            | -          | -          | -          | -          | -           | -           | -           | +/-        |
|              | Perinuclear - blastoderm nuclei  | +          | -          | -          | -          | -          | -             | -           | -           | -           | -           | -            | -          | -          | -          | +          | -           | -           | -           | +          |
|              | Perinuclear- pole cells          | -          | -          | -          | -          | -          | -             | -           | -           | -           | -           | -            | -          | -          | -          | +          | -           | -           | -           | -          |
|              | Amnioserosa - foci               | +          | +          | +          | -          | +          | -             | +           | -           | -           | -           | -            | +          | +          | +          | -          | -           | -           | -           | -          |
| Embryo 10-17 | Tracheal lumen*                  | +          | +          | +          | +          | -          | +             | +           | +           | +           | +           | -            | +          | +          | +          | +          | +           | +           | +           | +          |
|              | Tracheal system - specific area  | -          | -          | +          | -          | +          | -             | -           | -           | -           | -           | -            | -          | -          | -          | -          | +           | -           | -           | -          |
|              | Salivary gland - basal           | +          | +          | -          | -          | +          | -             | -           | +           | -           | -           | -            | +          | -          | -          | -          | -           | -           | -           | -          |
|              | Salivary gland - apical (lumen)* | +          | +          | +          | +          | +          | +             | -           | +           | -           | +           | +            | +          | +          | -          | +          | -           | +           | -           | +          |
|              | Hindgut - apical                 | -          | -          | -          | -          | -          | -             | -           | -           | -           | -           | +            | -          | -          | -          | -          | -           | -           | -           | +          |

|                                                 |                                                    |   |   |   |   |   |   |   |   |   |   |   |   |   |   |   |   |   |   |   |
|-------------------------------------------------|----------------------------------------------------|---|---|---|---|---|---|---|---|---|---|---|---|---|---|---|---|---|---|---|
|                                                 | Hindgut - basal                                    | - | - | - | - | - | - | - | + | - | - | - | - | - | - | - | - | - | - | - |
|                                                 | Enriched around<br>yolk nuclei                     | - | - | - | - | + | - | - | - | - | - | - | - | + | - | + | - | - | - | - |
|                                                 | Fluffy basal                                       | + | + | - | - | + | + | + | + | + | + | - | + | - | - | - | - | - | - | - |
|                                                 | Small foci                                         | + | - | + | - | + | - | - | - | - | + | + | - | + | - | - | - | - | - | - |
| Larva 3rd instar                                | Ring gland - foci                                  | + | + | + | - | + | + | - | + | + | + | - | + | + | + | + | + | + | + | + |
|                                                 | Ring gland -<br>perinuclear                        | - | - | - | - | + | - | - | - | - | - | - | - | - | + | - | - | - | - | - |
|                                                 | Ring gland -<br>perinuclear diffuse                | - | + | - | - | - | - | - | + | + | - | - | - | - | - | + | - | - | - | - |
|                                                 | Brain lobe - foci                                  | - | + | - | - | + | + | - | - | - | + | + | + | + | + | - | - | + | - | + |
|                                                 | Midgut - foci                                      | + | + | - | - | + | - | + | - | - | - | + | + | - | + | + | - | - | - | + |
|                                                 | Midgut - perinuclear<br>half moon                  | - | - | - | - | + | - | - | - | - | - | - | - | - | - | - | - | - | - | - |
|                                                 | Hindgut - foci                                     | + | - | - | - | + | - | - | - | + | - | - | - | - | - | + | - | - | - | - |
|                                                 | Gastric caeca - foci                               | + | - | - | + | - | - | + | - | - | - | - | + | - | + | - | + | - | - | + |
|                                                 | Fat body - foci                                    | + | + | + | + | - | + | + | + | + | + | + | + | + | + | + | + | + | + | + |
|                                                 | Fat body -<br>perinuclear half<br>moon             | - | - | - | - | + | - | - | - | - | - | - | - | - | - | - | - | - | - | - |
|                                                 | Salivary gland - foci                              | - | + | + | + | - | + | - | - | + | - | + | + | + | - | + | + | - | - | + |
|                                                 | Salivary gland -<br>perinuclear half<br>moon tight | - | - | - | - | + | + | + | + | + | - | - | + | - | - | + | - | - | - | - |
|                                                 | Salivary gland -<br>perinuclear half<br>moon loose | + | - | - | - | - | - | + | + | - | + | + | + | + | - | + | - | - | - | - |
|                                                 | Salivary gland -<br>perinuclear full               | - | - | - | - | - | - | - | - | - | - | - | - | + | - | - | - | - | - | - |
|                                                 | Malpighian tubule -<br>foci                        | + | + | - | + | + | + | + | + | + | - | + | + | + | + | + | + | - | + | + |
| Malpighian tubule -<br>perinuclear half<br>moon | -                                                  | - | - | - | + | - | - | + | - | - | - | - | - | - | - | - | - | - | - |   |
