# Supplementary material for: Spatial Profiling of Nuclear Receptor Transcription Patterns over the Course of Drosophila Development
Source: PubMed Central journal article supplement (PMC3704245; doi:10.1534/g3.113.006023), 2013-07-01
Supplement: supp_g3.113.006023_TableS1.pdf [file supp_g3.113.006023_TableS1.pdf]

**Table S1 *Drosophila* nuclear receptor and NOS isoforms and probes.** CG numbers, number of splice forms, and oligos used for probe template production are provided for each of the fly NR genes and NOS.

| Gene name (Abbreviation)                         | CG number                  | Number of isoforms | Probe name  | Oligos used (if home made)                                                                | It hybridizes to (size in base pairs)                                 |
|--------------------------------------------------|----------------------------|--------------------|-------------|-------------------------------------------------------------------------------------------|-----------------------------------------------------------------------|
| <i>Ecdysone receptor</i> (EcR)                   | CG1765                     | 6                  | LD26915     | NA                                                                                        | Multiple exons- including some 3'UTR. Covers all isoforms (1896)      |
| <i>ultraspiracle</i> (usp)                       | CG4380                     | 1                  | LD09973     | NA                                                                                        | The entire transcript (2481)                                          |
| <i>Hormone receptor-like in 46</i> (Hr46 or HR3) | CG3318<br>3                | 6                  | GH09429     | NA                                                                                        | Multiple exons and UTRs. Covers all isoforms (3827)                   |
|                                                  |                            |                    | GH21112     | NA                                                                                        | Multiple exons including 3'UTR. Covers all isoforms (4248)            |
| <i>Hr4</i> (HR4)                                 | CG4393<br>4<br>CG1690<br>2 | 9                  | HM-DHR4     | up:<br>5'..GACATG<br>AAGCCCAT<br>GTTCCCT                                                  | Part of last exon. Covers all isoforms and CG42527 (830)              |
|                                                  |                            |                    |             | down*:<br>5'..ATTAGC<br>GTGGTCAA<br>GCAGGT                                                |                                                                       |
| <i>Ecdysone-induced protein 75B</i> (E75)        | CG8127                     | 6                  | GM04985     | NA                                                                                        | Multiple exons including part of 3'UTR. Covers of all isoforms (3107) |
| <i>Ftz transcription factor 1</i> (Ftz-F1)       | CG4059                     | 3                  | LD34889     | NA                                                                                        | Multiple exons and part of 3'UTR. Covers all isoforms (2270)          |
|                                                  |                            |                    | LD11885     | NA                                                                                        | First exon. Covers RB isoform (842)                                   |
| <i>Hormone receptor-like in 39</i> (HR39)        | CG8676                     | 4                  | LD45021     | NA                                                                                        | Almost the entire transcript. Covers all isoforms (2999)              |
| <i>Hormone-receptor-like in 78</i> (HR78)        | CG7199                     | 6                  | GH08073     | NA                                                                                        | The entire transcript. Covers all isoforms (2283)                     |
| <i>Hormone receptor-like in 96</i> (HR96)        | CG1178<br>3                | 1                  | GH14435     | NA                                                                                        | The entire transcript (2834)                                          |
| <i>estrogen-related receptor</i> (dERR)          | CG7404                     | 2                  | GH28308     | NA                                                                                        | The entire transcript. Covers both isoforms (2125)                    |
| <i>Hepatocyte nuclear factor 4</i> (dHNF4)       | CG9310                     | 4                  | RE09535     | NA                                                                                        | The entire transcript. Covers all isoforms (3333)                     |
| <i>seven up</i> (svp)                            | CG1150<br>2                | 3                  | AT29920     | NA                                                                                        | The entire transcript. Covers RA and RB isoforms (2085)               |
|                                                  |                            |                    | GH08189     | NA                                                                                        | 3' UTR. Covers RC and RB isoforms (2023)                              |
| <i>Ecdysone-induced protein 78C</i> (E78)        | CG1802<br>3                | 4                  | HM-E78-Ex10 | up:<br>5'..CTTGCT<br>GAACTTTG<br>CCAACA<br><br>down*:<br>5'..GCTCGC<br>TCTTCAGT<br>CGAGTT | Last exon, including part of 3'UTR. Covers all isoforms (764)         |

|                                                  |             |    |                      |                                                                                           |                                                                            |
|--------------------------------------------------|-------------|----|----------------------|-------------------------------------------------------------------------------------------|----------------------------------------------------------------------------|
| <i>dissatisfaction</i><br>(dsf)                  | CG9019      | 1  | HM-dsf-<br>Ex4       | up:<br>5'..ACTCCA<br>TCCAGTCC<br>ATCTCG<br><br>down*:<br>5'..AGCAA<br>TGCTGGTC<br>GTTCTT  | Part of exon 4<br>(637)                                                    |
| <i>talilles</i><br>(tll)                         | CG1378      | 1  | HM-tll-Ex3           | up:<br>5'..AGGGAC<br>TCTGTGTG<br>GTGGAC<br><br>down*:<br>5'..TTGAGA<br>CCTTGTGC<br>ATCAGC | Most of exon 3<br>(1041)                                                   |
| <i>Hormone receptor</i><br>51<br>(HR51)          | CG1680<br>1 | 1  | HM-<br>DHR51-<br>Ex6 | up:<br>5'..ACCACC<br>TCACCTCC<br>TCAATG<br><br>down*:<br>5'..AAGAGC<br>TGACGGAG<br>GAGACA | Most of exon 6<br>(249)                                                    |
| <i>Hormone<br/>receptor-like in 38</i><br>(HR38) | CG1864      | 3  | HM-<br>DHR38         | up:<br>5'..CGACCA<br>CGTCACCT<br>ACAATG<br><br>down*:<br>5'..TAGTGC<br>CGAATGTT<br>GAGCAG | Last exon and part of 3'UTR.<br>Covers of all isoforms<br>(644)            |
| <i>Hormone receptor</i><br>83<br>(HR83)          | CG1029<br>6 | 1  | HM-<br>DHR83-<br>Ex1 | up:<br>5'..GGTGCT<br>CCTGCTTT<br>TTCAAG<br><br>down*:<br>5'..GCACAG<br>GATTAGGG<br>ACTCCA | Most of exon 1<br>(542)                                                    |
| <i>Nitric oxide<br/>synthase</i><br>(Nos)        | CG6713      | 10 | HM-NOS-<br>Ex16#     | up:<br>5'..GAACGA<br>TTCGCTGA<br>CTGTGA<br><br>down*:<br>5'..CTTCGG<br>AATGGCCT<br>GCTCC  | Part of exon 16. Covers 8/10<br>isoforms (not Nos-RJ nor Nos-RG)<br>(1078) |

\*-The sequence: 'GTAATACGACTCACTATAGGGAGACCAC' was added before each reverse oligo sequence to add a T7 polymerase binding site.

#- For the HM-NOS-E16 probe, PCR was first performed on genomic DNA with the following oligos: up-TCGGCTATCCAAATTTCTG and down- ACTCCTCGGTCCAAACACAC (1871 bp). The product was then amplified using the oligos indicated in the table to generate the 1078 bp template.
