# Supplementary material for: Spatial Profiling of Nuclear Receptor Transcription Patterns over the Course of Drosophila Development
Source: PubMed Central journal article supplement (PMC3704245; doi:10.1534/g3.113.006023), 2013-07-01
Supplement: supp_g3.113.006023_TableS2.pdf [file supp_g3.113.006023_TableS2.pdf]

Table S2 Summary of FISH expression data.

| Gene           | Stage    | Yolk | Gut | Hindgut | Foregut | Trachea | Post. spiracles | Fat Body | Ectoderm | PNS | CNS | Muscles | Oenocytes | Amnioserosa | Salivary glands | Malpighian tubules | Lymph gland | Ring gland | Brain lobes |    |
|----------------|----------|------|-----|---------|---------|---------|-----------------|----------|----------|-----|-----|---------|-----------|-------------|-----------------|--------------------|-------------|------------|-------------|----|
| <b>Ecr *</b>   | E1-5     | +    | NA  | NA      | NA      | NA      | NA              | NA       | NA       | NA  | NA  | NA      | NA        | NA          | NA              | NA                 | NA          | NA         | NA          | NA |
|                | E6-10    | +    |     | NA      | NA      | NA      | NA              | NA       |          |     |     | NA      |           | +           |                 | NA                 | NA          | NA         | NA          | NA |
|                | E11-14   |      | +   | +       | NA      |         | +               |          |          | +/- | +/- |         |           | +           | +               | NA                 | NA          | NA         | NA          | NA |
|                | E15-17   |      | +   | +       | +       | +       | +               |          | +        |     | +/- |         |           | NA          | +               |                    | NA          | NA         | NA          | NA |
|                | L3       | NA   | +   | +       | +       | +       | NA              | +        | NA       | NA  | +   | NA      | NA        | NA          | +               | +                  | +           | +          | +           | +  |
| <b>Usp ~*</b>  | E1-5     | +    | NA  | NA      | NA      | NA      | NA              | NA       | NA       | NA  | NA  | NA      | NA        | NA          | NA              | NA                 | NA          | NA         | NA          | NA |
|                | E6-10    | +    | +   | NA      | NA      | NA      | NA              | NA       | +/-      |     | +/- | NA      |           | +           |                 | NA                 | NA          | NA         | NA          | NA |
|                | E11-14   | +    | +   |         | NA      |         |                 |          | +        |     | +   |         |           | +/-         | +               | NA                 | NA          | NA         | NA          | NA |
|                | E15-17   | +    | +   |         | +       |         |                 |          | +        |     | +   | +       |           | NA          | +               | +/-                | NA          | NA         | NA          | NA |
|                | L3       | NA   | +   | +       | +       | +       | NA              | +        | NA       | NA  | +   | NA      | NA        | NA          | +               | +                  | +           | +          | +           | +  |
| <b>HR3</b>     | E1-5     | +    | NA  | NA      | NA      | NA      | NA              | NA       | NA       | NA  | NA  | NA      | NA        | NA          | NA              | NA                 | NA          | NA         | NA          | NA |
|                | E6-10    | +    | +   | NA      | NA      | NA      | NA              | NA       | +        |     |     | NA      |           | +           |                 | NA                 | NA          | NA         | NA          | NA |
|                | E11-14   | +    | +   | +       | NA      | +       | +               | +        | +        |     |     | +       |           | +           | +               | NA                 | NA          | NA         | NA          | NA |
|                | E15-17   | +    | +   | +       | +       | +       | +               | +        | +        | +   | +   | +       |           | NA          | +               |                    | NA          | NA         | NA          | NA |
|                | L3       | NA   | +   | +       | +       | +       | NA              | +        | NA       | NA  | +   | NA      | NA        | NA          | +               | +                  | +           | +          | +           | +  |
| <b>HR4</b>     | E1-5     | +    | NA  | NA      | NA      | NA      | NA              | NA       | NA       | NA  | NA  | NA      | NA        | NA          | NA              | NA                 | NA          | NA         | NA          | NA |
|                | E6-10    |      |     | NA      | NA      | NA      | NA              | NA       |          |     |     | NA      |           |             |                 | NA                 | NA          | NA         | NA          | NA |
|                | E11-14   | +    | +   | +       | NA      |         |                 |          |          |     |     | +       |           |             | +               | NA                 | NA          | NA         | NA          | NA |
|                | E15-17   | +    | +   | +       | +       | +       | +               | +        |          |     |     | +       |           | NA          | +               |                    | NA          | NA         | NA          | NA |
|                | L3       | NA   |     |         |         | +       | NA              | +        | NA       | NA  |     | NA      | NA        | NA          | +               | +                  | +           | +          | +           | +  |
| <b>E75</b>     | E1-5     | +    | NA  | NA      | NA      | NA      | NA              | NA       | NA       | NA  | NA  | NA      | NA        | NA          | NA              | NA                 | NA          | NA         | NA          | NA |
|                | E6-10    | +    |     | NA      | NA      | NA      | NA              | NA       |          |     |     | NA      |           |             |                 | NA                 | NA          | NA         | NA          | NA |
|                | E11-14   | +    | +   |         | NA      | +       |                 |          | +        | +   |     |         |           | +           | +               | NA                 | NA          | NA         | NA          | NA |
|                | E15-17   | +    | +   |         | +       | +       | +/-             |          |          | +   | +   |         | +         | NA          | +               | +                  | NA          | NA         | NA          | NA |
|                | L3       | NA   | +   | +       | +       | +       | NA              | +        | NA       | NA  | +   | NA      | NA        | NA          | +               | +                  | +           | +          | +           | +  |
| <b>Fz-F1 *</b> | E1-5     | +    | NA  | NA      | NA      | NA      | NA              | NA       | NA       | NA  | NA  | NA      | NA        | NA          | NA              | NA                 | NA          | NA         | NA          | NA |
|                | E6-10    | +    |     | NA      | NA      | NA      | NA              | NA       |          |     |     | NA      |           |             |                 | NA                 | NA          | NA         | NA          | NA |
|                | E11-14   |      | +   | +       | NA      | +       |                 |          | +        | +/- | +   |         |           |             | +               | NA                 | NA          | NA         | NA          | NA |
|                | E15-17   | +    | +   |         | +       | +       | +               |          | +        | +/- | +   |         |           | NA          | +               |                    | NA          | NA         | NA          | NA |
|                | L3       | NA   | +   | +       |         | +       | NA              | +        | NA       | NA  | +   | NA      | NA        | NA          | +               | +                  | +           | +          | +           | +  |
| <b>HR39 *</b>  | E1-5     | +    | NA  | NA      | NA      | NA      | NA              | NA       | NA       | NA  | NA  | NA      | NA        | NA          | NA              | NA                 | NA          | NA         | NA          | NA |
|                | E6-10    | +    |     | NA      | NA      | NA      | NA              | NA       |          |     |     | NA      |           | +           |                 | NA                 | NA          | NA         | NA          | NA |
|                | E11-14   | +    | +   |         | NA      |         |                 | +        | +        |     |     |         |           |             |                 | NA                 | NA          | NA         | NA          | NA |
|                | E15-17   |      | +   |         | +       | +       | +               | +        | +        |     | +   |         |           | NA          | +               |                    | NA          | NA         | NA          | NA |
|                | L3       | NA   | +   | +       |         | +       | NA              | +        | NA       | NA  |     | NA      | NA        | NA          | +               | +                  | +           | +          |             |    |
| <b>IR7</b>     | <b>8</b> | E1-5 | +   | NA      | NA      | NA      | NA              | NA       | NA       | NA  | NA  | NA      | NA        | NA          | NA              | NA                 | NA          | NA         | NA          | NA |

|         |        |       |     |    |    |     |    |     |    |    |    |    |    |    |     |     |    |     |    |
|---------|--------|-------|-----|----|----|-----|----|-----|----|----|----|----|----|----|-----|-----|----|-----|----|
|         | E6-10  | +     |     | NA | NA | NA  | NA | NA  |    |    |    | NA |    | +  |     | NA  | NA | NA  | NA |
|         | E11-14 |       | +   | +  | NA | +   |    |     | +  |    | +  |    |    |    | +   | NA  | NA | NA  | NA |
|         | E15-17 |       | +   | +  | +  | +   |    | +/- | +  |    | +  |    |    | NA | +   |     | NA |     | NA |
|         | L3     | NA    | +   | +  |    | +   | NA | +   | NA | NA |    | NA | NA | NA | +   | +   | +  | +   | +  |
| HR96 *  | E1-5   | +     | NA  | NA | NA | NA  | NA | NA  | NA | NA | NA | NA | NA | NA | NA  | NA  | NA | NA  | NA |
|         | E6-10  | +     |     | NA | NA | NA  | NA | NA  | +  |    |    | NA |    |    |     | NA  | NA | NA  | NA |
|         | E11-14 |       | +   | +  | NA |     |    |     | +  |    | +  | +  |    |    |     | NA  | NA | NA  | NA |
|         | E15-17 |       | +   | +  | +  | +   | +  |     |    |    | +  |    |    | NA |     |     | NA | NA  | NA |
|         | L3     | NA    | +   | +  |    | +   | NA | +   | NA | NA | +  | NA | NA | NA | +   | +   | +  | +   | +  |
| dERR *  | E1-5   | +     | NA  | NA | NA | NA  | NA | NA  | NA | NA | NA | NA | NA | NA | NA  | NA  | NA | NA  | NA |
|         | E6-10  | +     |     | NA | NA | NA  | NA | NA  |    |    |    | NA |    | +  |     | NA  | NA | NA  | NA |
|         | E11-14 |       | +/- |    | NA |     |    |     |    |    | +  |    |    | +  | +   | NA  | NA | NA  | NA |
|         | E15-17 |       |     | +  | +  | +   | +  | +/- | +  |    | +  | +  |    | NA | +   |     | NA | NA  | NA |
|         | L3     | NA    | +   | +  | +  | +   | NA | +   | NA | NA | +  | NA | NA | NA | +   | +   | +  | +   | +  |
| dHNF4 * | E1-5   | +     | NA  | NA | NA | NA  | NA | NA  | NA | NA | NA | NA | NA | NA | NA  | NA  | NA | NA  | NA |
|         | E6-10  | +     |     | NA | NA | NA  | NA | NA  | +  |    |    | NA |    | +  |     | NA  | NA | NA  | NA |
|         | E11-14 |       | +/- |    | NA |     |    |     | +  |    |    |    | +  |    | +   | NA  | NA | NA  | NA |
|         | E15-17 |       | +/- |    | +  |     |    |     | +  |    | +  |    | +  | NA | +   | +   | NA | NA  | NA |
|         | L3     | NA    | +   | +  |    | +   | NA | +   | NA | NA | +  | NA | NA | NA | +   | +   | +  | +/- | +  |
| Svp *   | E1-5   | +     | NA  | NA | NA | NA  | NA | NA  | NA | NA | NA | NA | NA | NA | NA  | NA  | NA | NA  | NA |
|         | E6-10  | +     |     | NA | NA | NA  | NA | NA  |    | +  | +  | NA |    |    | +   | NA  | NA | NA  | NA |
|         | E11-14 |       | +/- |    | NA | +   | +  |     |    | +  | +  |    | +  |    | +   | NA  | NA | NA  | NA |
|         | E15-17 |       |     |    | +  | +   | +  | +   | +  | +  | +  |    | +  | NA | +\$ |     | NA | NA  | NA |
|         | L3     | NA    | +   |    | +  | +   | NA | +   | NA | NA | +  | NA | NA | NA | +   | +   | +  | +   | +  |
| E78     | E1-5   | + S5  | NA  | NA | NA | NA  | NA | NA  | NA | NA | NA | NA | NA | NA | NA  | NA  | NA | NA  | NA |
|         | E6-10  | +     | +   |    | NA | NA  | NA | NA  | +  |    |    | NA |    | +  |     | NA  | NA | NA  | NA |
|         | E11-14 | +     | +   |    | NA |     |    | +   | +  | +  |    |    | +  | +  | NA  | NA  | NA | NA  |    |
|         | E15-17 |       |     |    | +  | +   | +  |     | +  |    |    |    |    | NA | +   | +/- | NA | NA  | NA |
|         | L3     | NA    | +   | +  | +  | +   | NA | +   | NA | NA | +  | NA | NA | NA | +   | +   | +  | +   | +  |
| dsf     | E1-5   |       | NA  | NA | NA | NA  | NA | NA  | NA | NA | NA | NA | NA | NA | NA  | NA  | NA | NA  | NA |
|         | E6-10  |       |     |    | NA | NA  | NA | NA  |    |    |    | NA |    |    |     | NA  | NA | NA  | NA |
|         | E11-14 |       |     |    | NA |     |    |     |    |    |    |    |    |    | +   | NA  | NA | NA  | NA |
|         | E15-17 |       |     |    |    | +/- | +  |     |    |    |    |    |    | NA | +   |     | NA | NA  | NA |
|         | L3     | NA    | +   |    |    | +/- | NA | +   | NA | NA |    | NA | NA | NA | +   | +   | +  | +   | +  |
| tII     | E1-5   | +/- % | NA  | NA | NA | NA  | NA | NA  | NA | NA | NA | NA | NA | NA | NA  | NA  | NA | NA  | NA |
|         | E6-10  | +/- % |     |    | NA | NA  | NA | NA  |    |    |    | NA |    |    |     | NA  | NA | NA  | NA |
|         | E11-14 | +     | +/- |    | NA |     |    |     |    |    | +  |    |    |    | +   | NA  | NA | NA  | NA |
|         | E15-17 | +     | +/- |    | +  | +   |    |     | +  |    | +  |    |    | NA | +   |     | NA | NA  | NA |
|         | L3     | NA    | +   | +  | +  | +   | NA | +   | NA | NA | +  | NA | NA | NA | +   | +   | +  | +   | +  |

|      |        |     |    |    |    |     |    |     |     |    |     |    |    |    |    |    |    |    |    |    |
|------|--------|-----|----|----|----|-----|----|-----|-----|----|-----|----|----|----|----|----|----|----|----|----|
| HR51 | E1-5   |     | NA | NA | NA | NA  | NA | NA  | NA  | NA | NA  | NA | NA | NA | NA | NA | NA | NA | NA |    |
|      | E6-10  |     |    | NA | NA | NA  | NA | NA  |     |    |     | NA |    |    |    | NA | NA | NA | NA |    |
|      | E11-14 |     |    |    | NA | +   | +  | (^) |     | +  | (#) | +  |    |    |    |    | NA | NA | NA | NA |
|      | E15-17 |     |    |    | +  | +   | +  | (^) |     | +  | (#) |    |    |    | NA | +  |    | NA | NA | NA |
|      | L3     | NA  |    |    |    | +/- | NA | +   | NA  | NA |     | NA | NA | NA | +  | +  | +  | +  | +  |    |
| HR38 | E1-5   |     | NA | NA | NA | NA  | NA | NA  | NA  | NA | NA  | NA | NA | NA | NA | NA | NA | NA | NA |    |
|      | E6-10  |     |    | NA | NA | NA  | NA | NA  |     |    |     | NA |    |    |    | NA | NA | NA | NA |    |
|      | E11-14 |     |    |    | NA |     |    |     |     |    |     |    |    |    |    | NA | NA | NA | NA |    |
|      | E15-17 |     |    |    |    | +   | +  |     | +/- |    |     |    |    | NA | +  |    | NA | NA | NA |    |
|      | L3     | NA  |    |    |    | +   | NA | +   | NA  | NA | +   | NA | NA | NA |    |    | +  | +  |    |    |
| HR33 | E1-5   |     | NA | NA | NA | NA  | NA | NA  | NA  | NA | NA  | NA | NA | NA | NA | NA | NA | NA | NA |    |
|      | E6-10  |     |    | NA | NA | NA  | NA | NA  |     |    |     | NA |    |    |    | NA | NA | NA | NA |    |
|      | E11-14 |     |    |    | NA |     |    |     |     |    |     |    |    |    | +  | NA | NA | NA | NA |    |
|      | E15-17 |     |    |    |    | +   |    |     |     |    |     |    |    | NA | +  |    | NA | NA | NA |    |
|      | L3     | NA  |    |    |    | +/- | NA | +   | NA  | NA |     | NA | NA | NA | +  | +  | +  | +  |    |    |
| Nos  | E1-5   | +/- | NA | NA | NA | NA  | NA | NA  | NA  | NA | NA  | NA | NA | NA | NA | NA | NA | NA | NA |    |
|      | E6-10  | +   | +  | NA | NA | NA  | NA | NA  |     |    |     | NA |    |    |    | NA | NA | NA | NA |    |
|      | E11-14 | +   | +  | +  | NA |     |    |     |     |    |     |    |    |    |    | NA | NA | NA | NA |    |
|      | E15-17 | +   | +  | +  | +  | +   | +  | +   |     |    | +   | +  |    | NA | +  |    | NA | NA | NA |    |
|      | L3     | NA  | +  |    | +  | +   | NA | +   | NA  | NA |     | NA | NA | NA | +  | +  | +  | +  | +  |    |

+: expressed, NA: not applicable, \*: “fluffy” basal localization, ^: posterior spiracle outer layer, #: stripes, s5: stage 5 only, %: *tll* is zygotically expressed at this stage, some transcript ends up at the yolk. ~: low ubiquitous expression, @: specific to *svp*-AT29920 probe, \$: specific to *svp*-GH0819 probe. Shaded grey: matches spatial activities noted in Palanker *et al* 2006.
