# Supplementary material for: Spatial Profiling of Nuclear Receptor Transcription Patterns over the Course of Drosophila Development
Source: PubMed Central journal article supplement (PMC3704245; doi:10.1534/g3.113.006023), 2013-07-01
Supplement: supp_g3.113.006023_TableS3.pdf [file supp_g3.113.006023_TableS3.pdf]

**Table S3 Summary of FISH subcellular patterns.** A summary of all the subcellular RNA patterns found in this study. The developmental stages are shown at the left of the Table. +: pattern present, -: pattern absent.

| Stage        | Term                             | <i>ECR</i> | <i>usp</i> | <i>HR3</i> | <i>HR4</i> | <i>E75</i> | <i>Ftz-F1</i> | <i>HR39</i> | <i>HR78</i> | <i>HR96</i> | <i>dERR</i> | <i>dHNF4</i> | <i>svp</i> | <i>E78</i> | <i>dsf</i> | <i>tll</i> | <i>HR51</i> | <i>HR38</i> | <i>HR83</i> | <i>Nos</i> |
|--------------|----------------------------------|------------|------------|------------|------------|------------|---------------|-------------|-------------|-------------|-------------|--------------|------------|------------|------------|------------|-------------|-------------|-------------|------------|
| Embryo 1-3   | Pole plasm excluded              | +          | -          | -          | -          | +          | -             | -           | +           | +           | +           | -            | +          | -          | -          | -          | -           | -           | -           | -          |
|              | Cortex excluded                  | +          | -          | -          | -          | +          | -             | -           | -           | +           | +           | -            | +          | -          | -          | -          | -           | -           | -           | -          |
|              | Small foci                       | -          | -          | +          | -          | +          | -             | -           | -           | -           | -           | +            | -          | -          | -          | -          | -           | -           | -           | -          |
|              | Enriched around yolk nuclei      | +          | -          | -          | -          | +          | -             | -           | +           | -           | +           | +            | -          | -          | -          | -          | -           | -           | -           | -          |
| Embryo 4-5   | Pole cell excluded               | +          | -          | +          | -          | +          | +             | +           | +           | +           | +           | -            | +          | +          | -          | +          | -           | -           | -           | -          |
|              | Apical excluded                  | +          | -          | +          | -          | +          | +             | +           | +           | +           | +           | -            | +          | +          | -          | -          | -           | -           | -           | -          |
|              | Basal excluded                   | +          | -          | +          | -          | +          | +             | +           | +           | +           | +           | -            | +          | +          | -          | -          | -           | -           | -           | -          |
|              | Cortex excluded                  | +          | -          | +          | -          | +          | +             | +           | +           | +           | +           | -            | +          | +          | -          | -          | -           | -           | -           | -          |
|              | Apical enriched                  | -          | -          | -          | -          | -          | -             | -           | -           | -           | -           | -            | -          | -          | -          | +          | -           | -           | -           | -          |
|              | Basal enriched                   | -          | -          | -          | -          | -          | -             | -           | -           | -           | -           | -            | -          | -          | -          | +          | -           | -           | -           | -          |
|              | Enriched around yolk nuclei      | +          | -          | -          | -          | +          | +             | -           | +           | +           | +           | -            | +          | +          | -          | -          | -           | -           | -           | +          |
|              | Perinuclear- yolk nuclei         | -          | -          | -          | -          | -          | -             | -           | +           | -           | +           | -            | -          | -          | -          | -          | -           | -           | -           | -          |
| Embryo 6-7   | Pole cell excluded               | -          | -          | -          | -          | +          | -             | +           | +           | +           | +           | -            | -          | +          | -          | -          | -           | -           | -           | -          |
|              | Apical excluded                  | +          | -          | -          | -          | +          | -             | +           | +           | +           | +           | -            | -          | -          | -          | -          | -           | -           | -           | -          |
|              | Basal excluded                   | -          | -          | -          | -          | -          | -             | -           | -           | -           | -           | -            | -          | -          | -          | -          | -           | -           | -           | -          |
|              | Apical enriched                  | -          | -          | -          | -          | -          | -             | -           | -           | -           | -           | -            | -          | -          | -          | +          | -           | -           | -           | -          |
|              | Basal enriched                   | +          | -          | +          | -          | +          | -             | +           | +           | +           | +           | +            | +          | +          | -          | +          | -           | -           | -           | -          |
|              | Enriched around yolk nuclei      | +          | -          | -          | -          | +          | -             | +           | +           | +           | +           | +            | +          | -          | -          | -          | -           | -           | -           | +          |
|              | Perinuclear- yolk nuclei         | -          | -          | -          | -          | -          | -             | -           | +           | +           | -           | -            | -          | -          | -          | -          | -           | -           | -           | -          |
|              | Perinuclear- pole cells          | -          | -          | -          | -          | -          | -             | -           | -           | -           | -           | -            | -          | -          | -          | +          | -           | -           | -           | -          |
| Embryo 8-9   | Small foci                       | +          | -          | +          | -          | +          | +             | +           | -           | +           | +           | +            | +          | +          | -          | +          | -           | -           | -           | -          |
|              | Apical enriched                  | -          | -          | -          | -          | +          | -             | -           | -           | -           | -           | -            | -          | -          | -          | -          | -           | -           | -           | -          |
|              | Basal enriched                   | +          | +          | -          | -          | -          | -             | +           | +           | +           | +           | -            | -          | -          | -          | +          | -           | -           | -           | +          |
|              | Fluffy basal                     | +          | -          | -          | -          | -          | -             | -           | +           | -           | -           | -            | -          | -          | -          | -          | -           | -           | -           | -          |
|              | Enriched around yolk nuclei      | -          | -          | -          | -          | +          | -             | -           | +           | -           | -           | -            | -          | -          | -          | -          | -           | -           | -           | +          |
|              | Perinuclear- yolk nuclei         | -          | -          | -          | -          | -          | -             | -           | -           | -           | -           | -            | -          | -          | -          | -          | -           | -           | -           | +/-        |
|              | Perinuclear - blastoderm nuclei  | +          | -          | -          | -          | -          | -             | -           | -           | -           | -           | -            | -          | -          | -          | +          | -           | -           | -           | +          |
|              | Perinuclear- pole cells          | -          | -          | -          | -          | -          | -             | -           | -           | -           | -           | -            | -          | -          | -          | +          | -           | -           | -           | -          |
|              | Amnioserosa - foci               | +          | +          | +          | -          | +          | -             | +           | -           | -           | -           | -            | +          | +          | +          | -          | -           | -           | -           | -          |
| Embryo 10-17 | Tracheal lumen*                  | +          | +          | +          | +          | -          | +             | +           | +           | +           | +           | -            | +          | +          | +          | +          | +           | +           | +           | +          |
|              | Tracheal system - specific area  | -          | -          | +          | -          | +          | -             | -           | -           | -           | -           | -            | -          | -          | -          | -          | +           | -           | -           | -          |
|              | Salivary gland - basal           | +          | +          | -          | -          | +          | -             | -           | +           | -           | -           | -            | +          | -          | -          | -          | -           | -           | -           | -          |
|              | Salivary gland - apical (lumen)* | +          | +          | +          | +          | +          | +             | -           | +           | -           | +           | +            | +          | +          | -          | +          | -           | +           | -           | +          |
|              | Hindgut - apical                 | -          | -          | -          | -          | -          | -             | -           | -           | -           | -           | +            | -          | -          | -          | -          | -           | -           | -           | +          |

|                                                 |                                                    |   |   |   |   |   |   |   |   |   |   |   |   |   |   |   |   |   |   |   |
|-------------------------------------------------|----------------------------------------------------|---|---|---|---|---|---|---|---|---|---|---|---|---|---|---|---|---|---|---|
|                                                 | Hindgut - basal                                    | - | - | - | - | - | - | - | - | + | - | - | - | - | - | - | - | - | - | - |
|                                                 | Enriched around<br>yolk nuclei                     | - | - | - | - | + | - | - | - | - | - | - | - | + | - | + | - | - | - | - |
|                                                 | Fluffy basal                                       | + | + | - | - | + | + | + | + | + | + | - | + | - | - | - | - | - | - | - |
|                                                 | Small foci                                         | + | - | + | - | + | - | - | - | - | + | + | - | + | - | - | - | - | - | - |
| Larva 3rd instar                                | Ring gland - foci                                  | + | + | + | - | + | + | - | + | + | + | - | + | + | + | + | + | + | + | + |
|                                                 | Ring gland -<br>perinuclear                        | - | - | - | - | + | - | - | - | - | - | - | - | - | + | - | - | - | - | - |
|                                                 | Ring gland -<br>perinuclear diffuse                | - | + | - | - | - | - | - | + | + | - | - | - | - | - | + | - | - | - | - |
|                                                 | Brain lobe - foci                                  | - | + | - | - | + | + | - | - | - | + | + | + | + | + | - | - | + | - | + |
|                                                 | Midgut - foci                                      | + | + | - | - | + | - | + | - | - | - | + | + | - | + | + | - | - | - | + |
|                                                 | Midgut - perinuclear<br>half moon                  | - | - | - | - | + | - | - | - | - | - | - | - | - | - | - | - | - | - | - |
|                                                 | Hindgut - foci                                     | + | - | - | - | + | - | - | - | + | - | - | - | - | - | + | - | - | - | - |
|                                                 | Gastric caeca - foci                               | + | - | - | + | - | - | + | - | - | - | - | + | - | + | - | + | - | - | + |
|                                                 | Fat body - foci                                    | + | + | + | + | - | + | + | + | + | + | + | + | + | + | + | + | + | + | + |
|                                                 | Fat body -<br>perinuclear half<br>moon             | - | - | - | - | + | - | - | - | - | - | - | - | - | - | - | - | - | - | - |
|                                                 | Salivary gland - foci                              | - | + | + | + | - | + | - | - | + | - | + | + | + | - | + | + | - | - | + |
|                                                 | Salivary gland -<br>perinuclear half<br>moon tight | - | - | - | - | + | + | + | + | + | - | - | + | - | - | + | - | - | - | - |
|                                                 | Salivary gland -<br>perinuclear half<br>moon loose | + | - | - | - | - | - | + | + | - | + | + | + | + | - | + | - | - | - | - |
|                                                 | Salivary gland -<br>perinuclear full               | - | - | - | - | - | - | - | - | - | - | - | - | + | - | - | - | - | - | - |
| Malpighian tubule -<br>foci                     | +                                                  | + | - | + | + | + | + | + | + | - | + | + | + | + | + | + | - | + | + |   |
| Malpighian tubule -<br>perinuclear half<br>moon | -                                                  | - | - | - | + | - | - | + | - | - | - | - | - | - | - | - | - | - | - |   |
